# Supplementary material for: Observation of memory effects associated with degradation of rechargeable lithium-ion cells using ultrafast surface-scan magnetic resonance imaging
Source: Royal Society of Chemistry journal article supplement (doi:10.1039/d1ta05747b), 2021-01-01
Supplement: d1ta05747b1.pdf [file d1ta05747b1.pdf]

**Supplementary Information for:**

**Observation of memory effects associated with degradation of rechargeable lithium-ion cells using ultrafast surface-scan magnetic resonance imaging.**

Konstantin Romanenko,<sup>\*a</sup> Alexej Jerschow<sup>b</sup>

a. School of Life and Environmental Sciences, University of Sydney, Building G08, Sydney, NSW 2006, Australia.

b. Department of Chemistry, New York University, 100 Washington Square East, New York, NY 10003

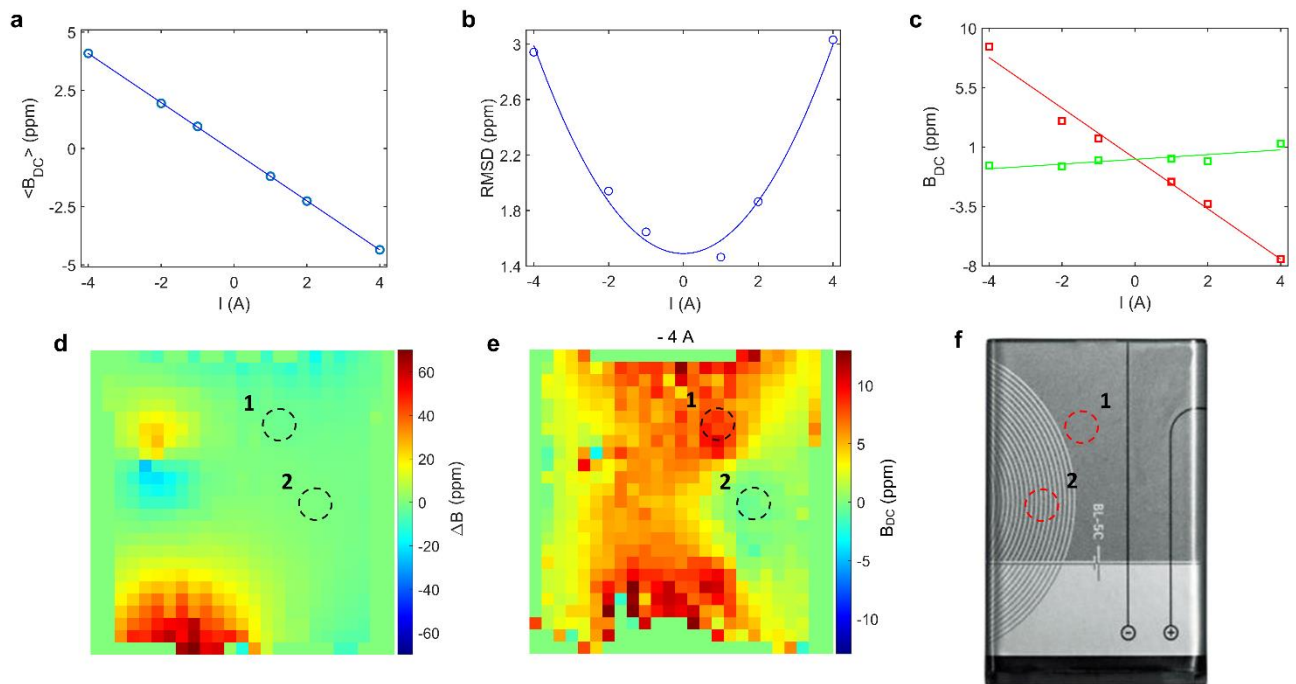

**Fig. S.1** (a) Pixel-by-pixel average,  $\langle B_{DC} \rangle$ , and (b) RMSD of the  $B_{DC}$  field distribution of a Nokia BL-5C cell as functions of current ( $I$ ) in the range from -4 A (discharging) to +4 A (charging). The  $\langle B_{DC} \rangle(I)$  data are approximated with a polynomial  $P_1 = -1.055 I - 0.14$ . The  $\text{RMSD}(I)$  data are approximated with a polynomial  $P_2 = 0.094 I^2 + 0.0005 I + 1.49$ . (c)  $B_{DC}$  values at locations “1” (red squares) and “2” (green squares) as indicated in subfigures (d-f). (d) Surface-scan MRI map of magnetic field perturbation  $\Delta B = B_{ST} + B_{SoC}$ . (e)  $B_{DC}$  field distribution produced by the cell (f) discharging at 4 A.
